# Supplementary material
Source: Springer Nature journal article supplement (https://www.springermedizin.de/resource/supplementary/13041_2013_248_MOESM2_ESM.pdf/25657870)

**A**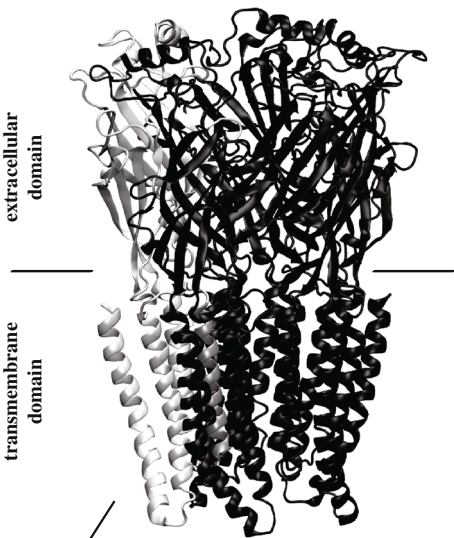**B**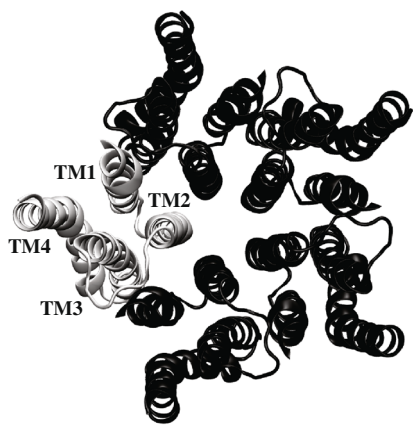**C**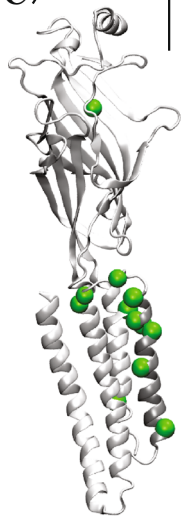

$\alpha 1$   
dominant

**D**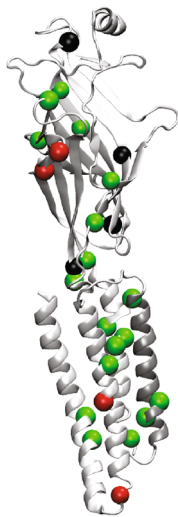

$\alpha 1$   
recessive

**E**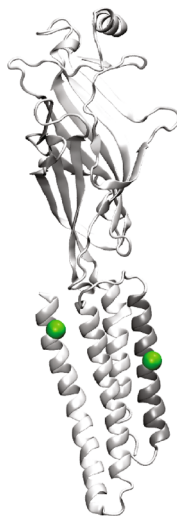

$\beta$   
dominant

**F**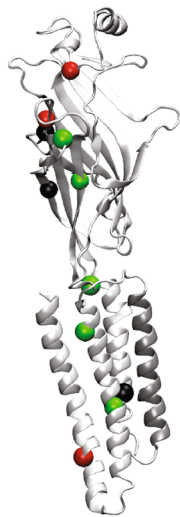

$\beta$   
recessive

Supplement: MOESM2 [file 25657870]
